# Supplementary material for: Determination of Zearalenone and Its Derivatives in Feed by Gas Chromatography–Mass Spectrometry with Immunoaffinity Column Cleanup and Isotope Dilution
Source: MDPI journal article supplement (doi:10.3390/toxins14110764), 2022-11-04
Supplement: s1 [file s1]

# **Determination of Zearalenone and Its Derivatives in Feed by Gas Chromatography-Mass Spectrometry with Immunoaffinity Column Cleanup and Isotope Dilution**

Sunlin Luo<sup>1†</sup>, Ying Liu <sup>1†</sup>, Qi Guo<sup>2</sup>, Xiong Wang<sup>2</sup>, Ying Tian<sup>1</sup>, Wenjun Yang<sup>1</sup>, Juntao Li<sup>1\*</sup> and Yiqiang Chen<sup>1\*</sup>

*1 State Key Laboratory of Animal Nutrition, College of Animal Science and Technology , China Agricultural University , Beijing 100193, China*

*2 Clover Technology Group Inc, Beijing 100044, China*

\* Corresponding author: Juntao Li and Yiqiang Chen, Email: lijuntao@cau.edu.cn (J.L.); yqchen@cau.edu.cn (Y.C.)

† Both authors contributed equally to the manuscript

**Table S1. Recoveries of mycotoxins from the spiked water.**

| <b>Mycotoxins</b>         | <b>Recovery (%)</b> |
|---------------------------|---------------------|
| ZAN                       | 96.8                |
| $\alpha$ -ZAL             | 95.9                |
| $\beta$ -ZAL              | 97.6                |
| ZEN                       | 100.0               |
| $\alpha$ -ZEL             | 98.7                |
| $\beta$ -ZEL              | 98.9                |
| Aflatoxins B <sub>1</sub> | 0                   |
| Ochratoxin                | 0                   |
| T-2 toxin                 | 0                   |
| Deoxynivalenol            | 0                   |
| Fumonisin                 | 0                   |

**Table S2. Acetonitrile-tolerance of IAC.**

| <b>Acetonitrile concentration<br/>in aqueous solution<br/>(%)</b> | <b>5%</b> | <b>10%</b> | <b>15%</b> | <b>20%</b> | <b>25%</b> | <b>30%</b> | <b>35%</b> | <b>40%</b> |
|-------------------------------------------------------------------|-----------|------------|------------|------------|------------|------------|------------|------------|
| Recovery (%)                                                      | 99.6      | 98.5       | 96.7       | 94.6       | 92.1       | 79.6       | 68.0       | 46.2       |

**Table S3. Recovery of IAC at different pH values.**

| <b>pH</b>    | <b>3.0</b> | <b>4.0</b> | <b>5.0</b> | <b>6.0</b> | <b>7.0</b> | <b>8.0</b> | <b>9.0</b> | <b>10.0</b> |
|--------------|------------|------------|------------|------------|------------|------------|------------|-------------|
| Recovery (%) | 13.5       | 36.5       | 67.6       | 86.7       | 99.9       | 85.1       | 55.3       | 36.8        |

**Table S4. Recovery of Reuse IAC.**

| <b>Times</b> | <b>1</b> | <b>2</b> | <b>3</b> | <b>4</b> | <b>5</b> | <b>6</b> | <b>7</b> | <b>8</b> | <b>9</b> | <b>10</b> |
|--------------|----------|----------|----------|----------|----------|----------|----------|----------|----------|-----------|
| Recovery (%) | 100      | 99.2     | 97.1     | 98.2     | 96.6     | 95.2     | 93.2     | 92.1     | 92.8     | 92.1      |

**Table S5. Recovery of six analytes in different feed matrices with and without isotope dilution.**

| <b>Analyte</b> | <b>Matrix</b>               | <b>Recovery with isotope dilution (%)</b> | <b>Recovery without isotope dilution (%)</b> |
|----------------|-----------------------------|-------------------------------------------|----------------------------------------------|
| ZAN            | Pig formula feed            | 123.25                                    | 105.6                                        |
|                | Pig concentrate feed        | 135.72                                    | 109.8                                        |
|                | Beef concentrate supplement | 114.73                                    | 102.0                                        |
|                | Chicken premix              | 110.06                                    | 97.1                                         |
| $\alpha$ -ZAL  | Pig formula feed            | 119.90                                    | 103.1                                        |
|                | Pig concentrate feed        | 122.12                                    | 108.9                                        |
|                | Beef concentrate supplement | 122.98                                    | 109.6                                        |
|                | Chicken premix              | 117.52                                    | 100.8                                        |
| $\beta$ -ZAL   | Pig formula feed            | 131.88                                    | 109.7                                        |
|                | Pig concentrate feed        | 134.18                                    | 110.1                                        |
|                | Beef concentrate supplement | 123.79                                    | 104.6                                        |
|                | Chicken premix              | 121.47                                    | 101.1                                        |
| ZEN            | Pig formula feed            | 138.42                                    | 110.5                                        |
|                | Pig concentrate feed        | 128.10                                    | 104.3                                        |
|                | Beef concentrate supplement | 115.72                                    | 102.2                                        |
|                | Chicken premix              | 129.38                                    | 103.7                                        |
| $\alpha$ -ZEL  | Pig formula feed            | 123.72                                    | 96.5                                         |
|                | Pig concentrate feed        | 130.22                                    | 103.6                                        |
|                | Beef concentrate supplement | 119.08                                    | 95.0                                         |
|                | Chicken premix              | 117.77                                    | 93.6                                         |
| $\beta$ -ZEL   | Pig formula feed            | 123.54                                    | 102.2                                        |
|                | Pig concentrate feed        | 135.01                                    | 107.5                                        |
|                | Beef concentrate supplement | 121.92                                    | 101.3                                        |
|                | Chicken premix              | 121.03                                    | 99.1                                         |
